# Supplementary material for: CD8+ T cells retain protective functions despite sustained inhibitory receptor expression during Epstein-Barr virus infection in vivo
Source: PLOS journal article supplement (doi:10.1371/journal.ppat.1007748), 2019-05-30
Supplement: S1 (10.1371/journal.ppat.1007748.s001) [file journal.ppat.1007748.s001]

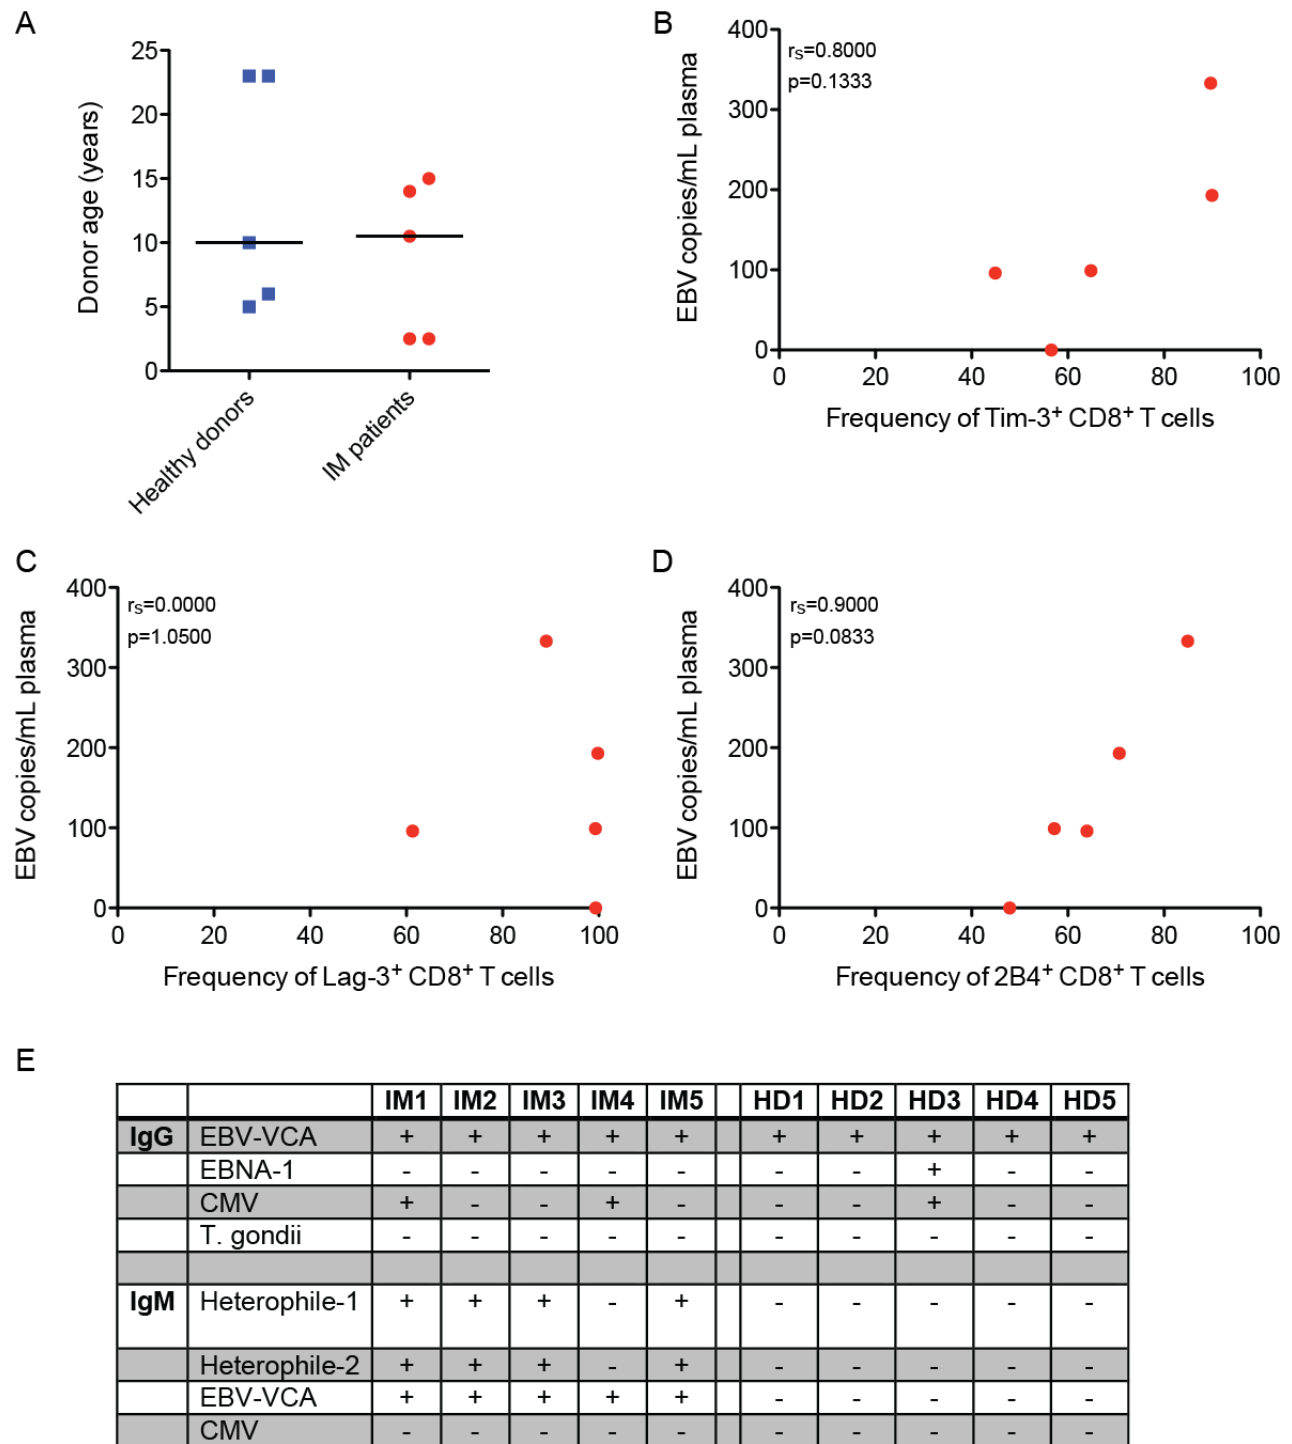

**Figure S1: Characteristics of IM patients and their T cells. A)** Donor ages, displayed together with the median. **B-D)** Viral load and indicated receptor correlations in IM patients. Each point represents one donor. Data were analyzed using the nonparametric Spearman correlation. **E)** Table indicating the serological test results of IM patients and healthy donors.
