# Supplementary material for: CD8+ T cells retain protective functions despite sustained inhibitory receptor expression during Epstein-Barr virus infection in vivo
Source: PLOS journal article supplement (doi:10.1371/journal.ppat.1007748), 2019-05-30
Supplement: S5 (10.1371/journal.ppat.1007748.s005) [file journal.ppat.1007748.s005]

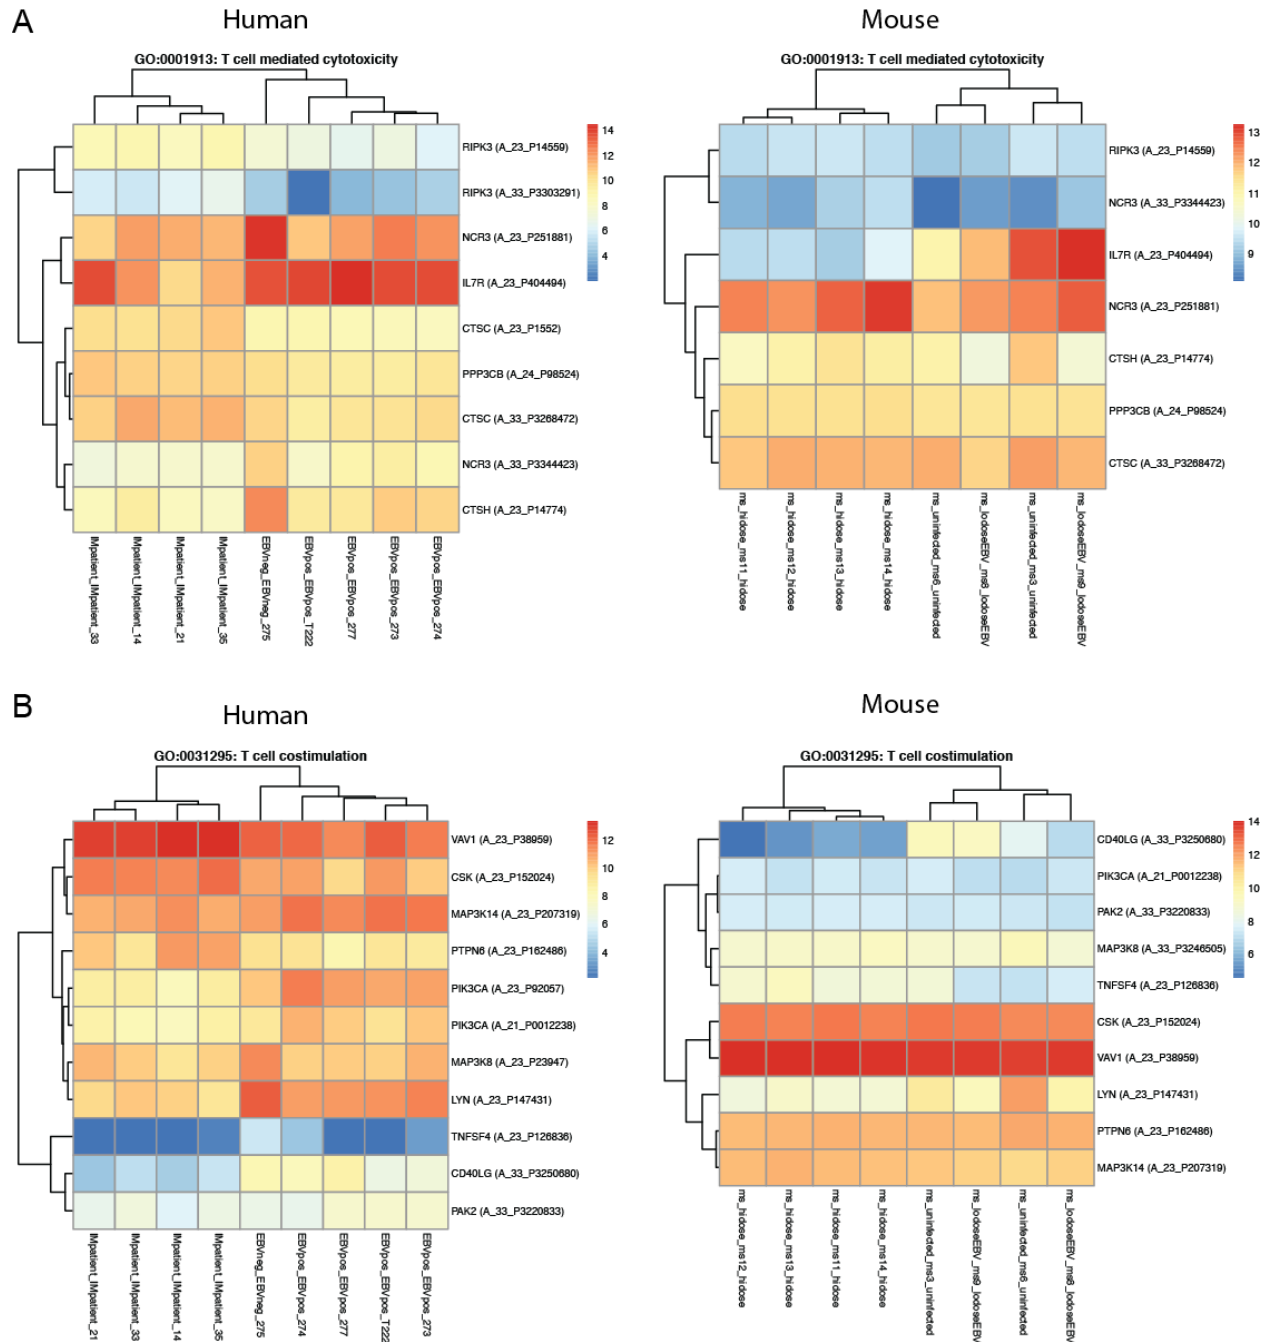

**Figure S5: IM patients and huNSG mice infected with EBV retain unique transcriptional characteristics.** **A)** Microarray data from Figure 3 examining genes found in the GO term for T cell mediated cytotoxicity (GO:0001913). Data are separated by species. **B)** Microarray data from Figure 3 examining genes found in the GO term for T cell costimulation (GO:0031295), separated by species.
