# Supplementary material for: CD8+ T cells retain protective functions despite sustained inhibitory receptor expression during Epstein-Barr virus infection in vivo
Source: PLOS journal article supplement (doi:10.1371/journal.ppat.1007748), 2019-05-30
Supplement: S7 (10.1371/journal.ppat.1007748.s007) [file journal.ppat.1007748.s007]

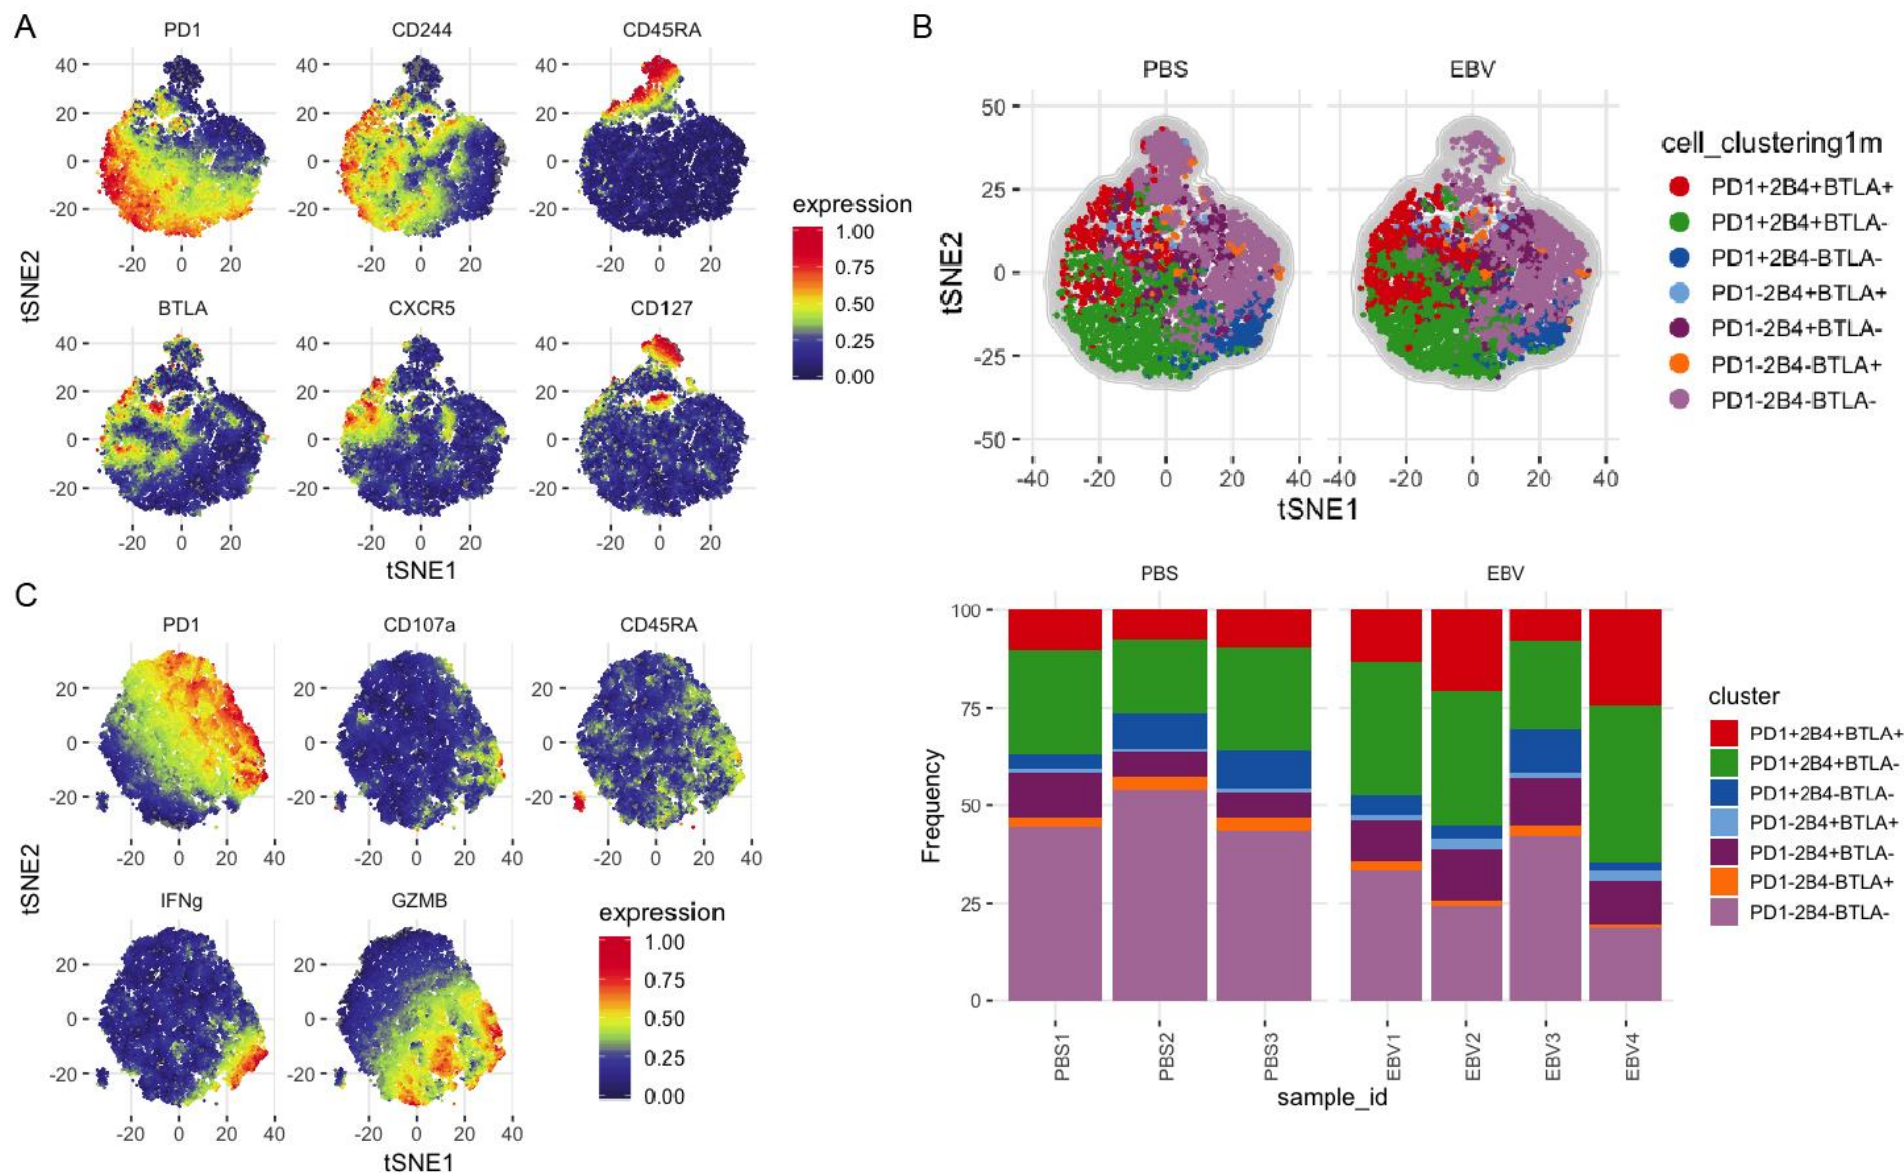

**Figure S7: PD-1<sup>+</sup> CD8<sup>+</sup> T cells co-express multiple inhibitory and differentiation receptors and retain functionality.** **A)** tSNE analysis of PD-1, CD244 (2B4), BTLA, CD127, CXCR5, and CD45RA co-expression within the CD8<sup>+</sup> population, where red indicates higher expression. **B)** Cell clustering analysis of the data from A), comparing PBS and high dose EBV conditions in huNSG animals and the frequencies of inhibitory and differentiation receptor containing populations in a tSNE plot (top), and graphically (bottom). **C)** tSNE analysis of the CD8<sup>+</sup> T cell population examining the coexpression of PD-1 and CD45RA together with CD107a, Granzyme B, and IFN $\gamma$ .
